# Supplementary material for: Evaluation of biomass-derived stabilising agents for colloidal silver nanoparticles via nanoparticle tracking analysis (NTA)
Source: Royal Society of Chemistry journal article supplement (doi:10.1039/c3ra40368h), 2013-01-01
Supplement: c3ra40368h.pdf [file c3ra40368h.pdf]

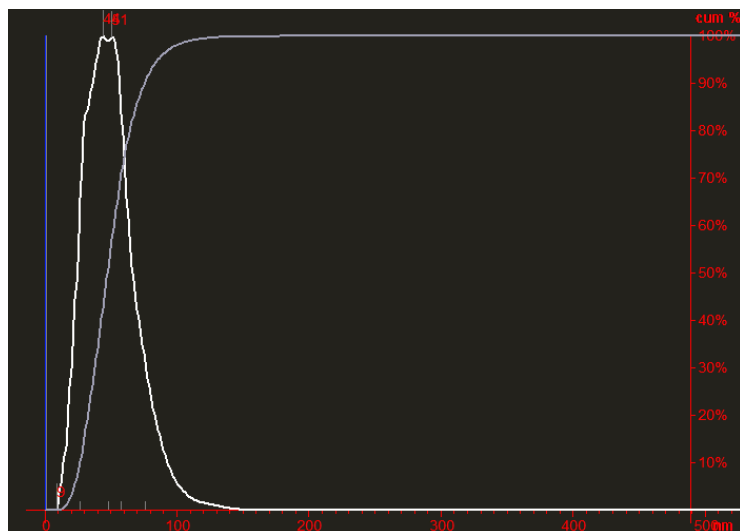

Particle Size / Concentration

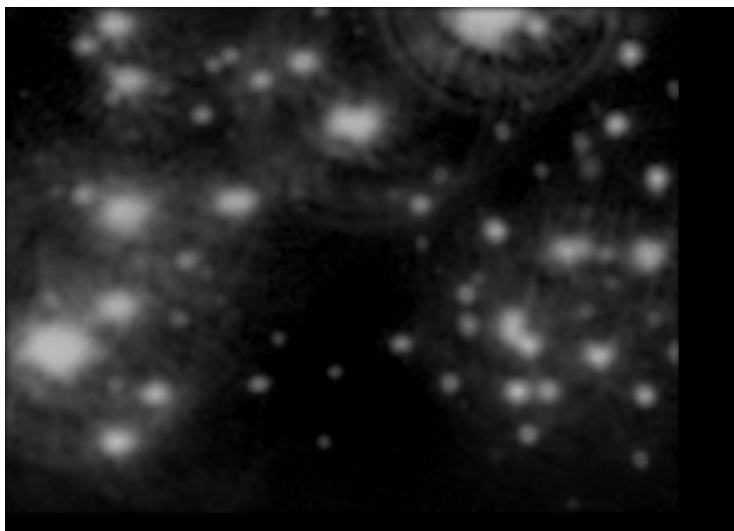

Sample Video Frame

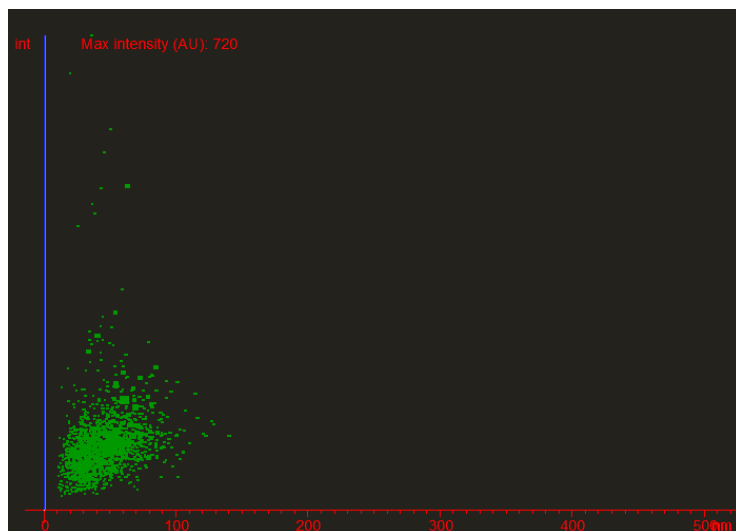

Particle Size / Relative Intensity

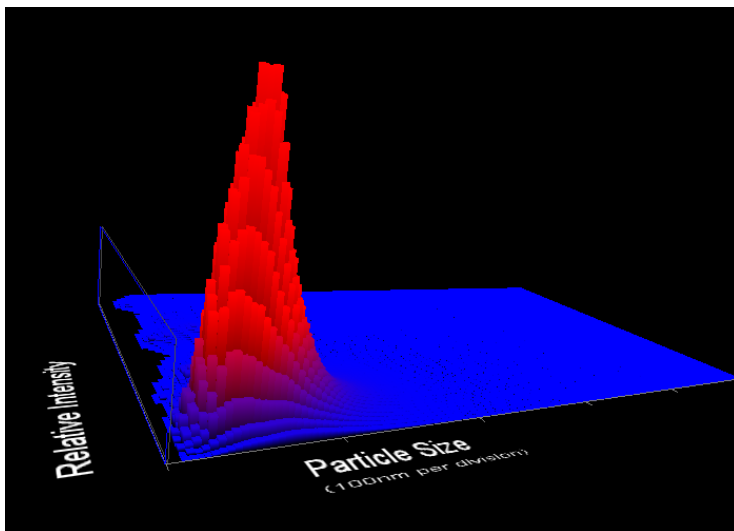

Particle Size / Relative Intensity 3D plot

Operator:  
Sample:  
Video File: syrup nc.avi analysis no: 002  
Date/Time of Report: 18/10/2012 11:45:03  
Dispersant/Diluent:  
Concentration:  
Pre-treatment:  
Remarks:

RESULTS:  
Size Distribution: Mean: 51 nm, Mode: 44 nm, SD: 19 nm  
Cumulative Data (nm): D10: 27, D50: 48, D90: 76, D70: 58  
User Lines: 1 nm, 0 nm  
Total Concentration: 40.39 particles / frame, 7.72E8 particles / ml  
Selected Concentration: 0.00 particles / frame, 0.00E8 particles / ml  
Fitted Curve : Mean: 0 nm, SD: 0  
Completed Tracks: 1706  
Drift Velocity: 1011 nm/s

ANALYSIS SETTINGS:  
Frames Processed: 1525 of 1525  
Frames per Second: 25.42  
Calibration: 158 nm/pixel  
Blur: Auto  
Detection Threshold: 10 Multi  
Min Track Length: Auto  
Min Expected Size: Auto  
Temperature: 25.80 °C  
Viscosity: 0.87 cP
