# Supplementary material for: Evaluation of biomass-derived stabilising agents for colloidal silver nanoparticles via nanoparticle tracking analysis (NTA)
Source: Royal Society of Chemistry journal article supplement (doi:10.1039/c3ra40368h), 2013-01-01
Supplement: c3ra40368h_2.pdf [file c3ra40368h_2.pdf]

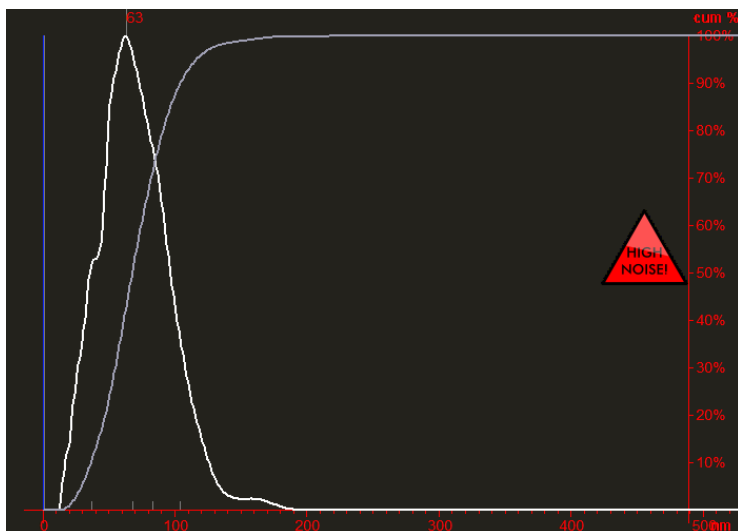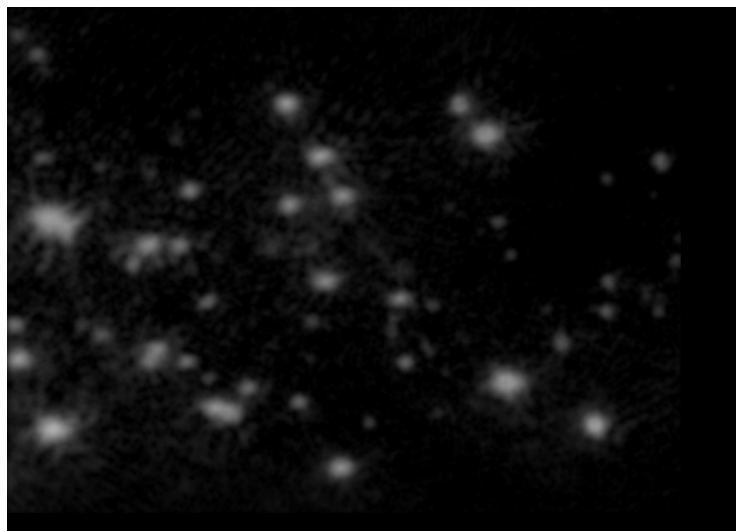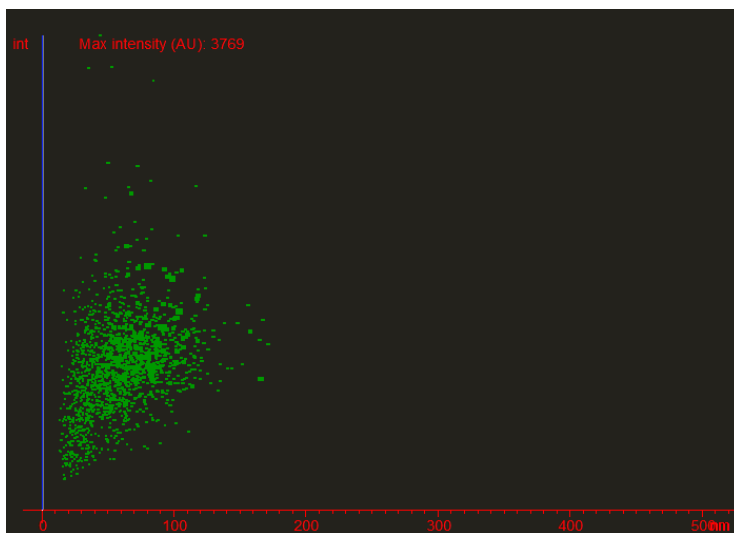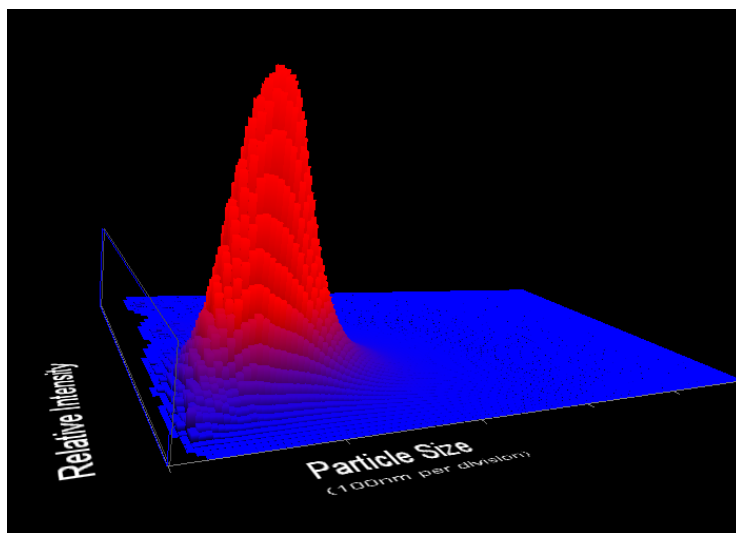

Operator:  
Sample:  
Video File: ag citric.avi analysis no: 002  
Date/Time of Report: 18/10/2012 11:54:21  
Dispersant/Diluent:  
Concentration:  
Pre-treatment:  
Remarks:

**RESULTS:**  
Size Distribution: Mean: 71 nm, Mode: 63 nm, SD: 26 nm  
Cumulative Data (nm): D10: 37, D50: 68, D90: 105, D70: 83  
User Lines: 1 nm, 0 nm  
Total Concentration: 59.12 particles / frame, 11.85E8 particles / ml  
Selected Concentration: 0.00 particles / frame, 0.00E8 particles / ml  
Fitted Curve : Mean: 0 nm, SD: 0  
Completed Tracks: 1582  
Drift Velocity: 2482 nm/s

**ANALYSIS SETTINGS:**  
Frames Processed: 1523 of 1523  
Frames per Second: 25.39  
Calibration: 158 nm/pixel  
Blur: Auto  
Detection Threshold: 10 Multi  
Min Track Length: Auto  
Min Expected Size: Auto  
Temperature: 26.10 °C  
Viscosity: 0.87 cP
