# Supplementary material for: Evaluation of biomass-derived stabilising agents for colloidal silver nanoparticles via nanoparticle tracking analysis (NTA)
Source: Royal Society of Chemistry journal article supplement (doi:10.1039/c3ra40368h), 2013-01-01
Supplement: c3ra40368h_3.pdf [file c3ra40368h_3.pdf]

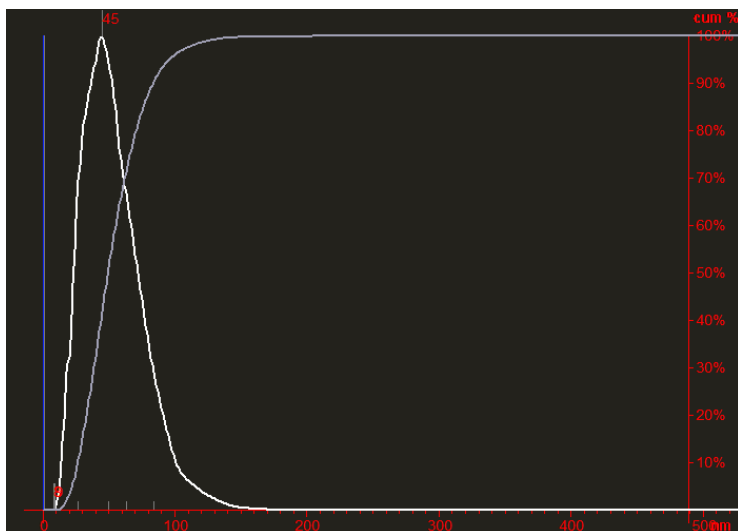

Particle Size / Concentration

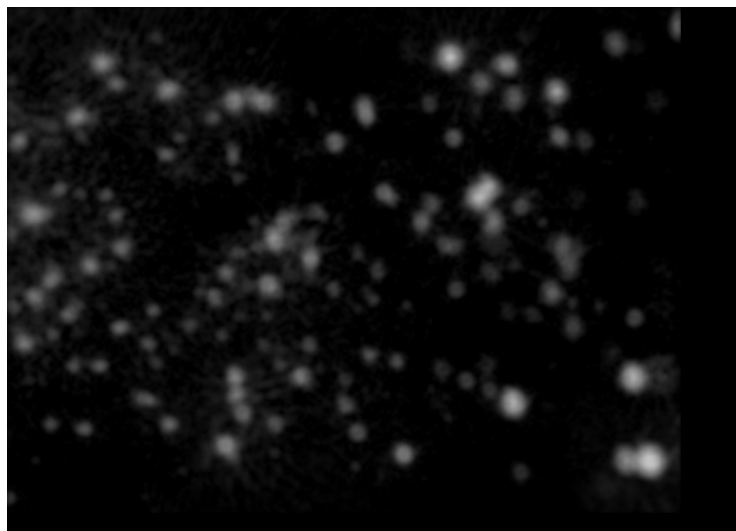

Sample Video Frame

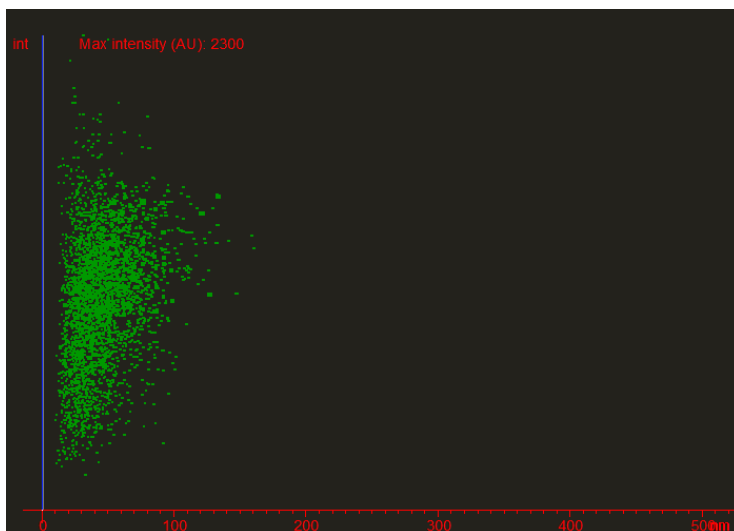

Particle Size / Relative Intensity

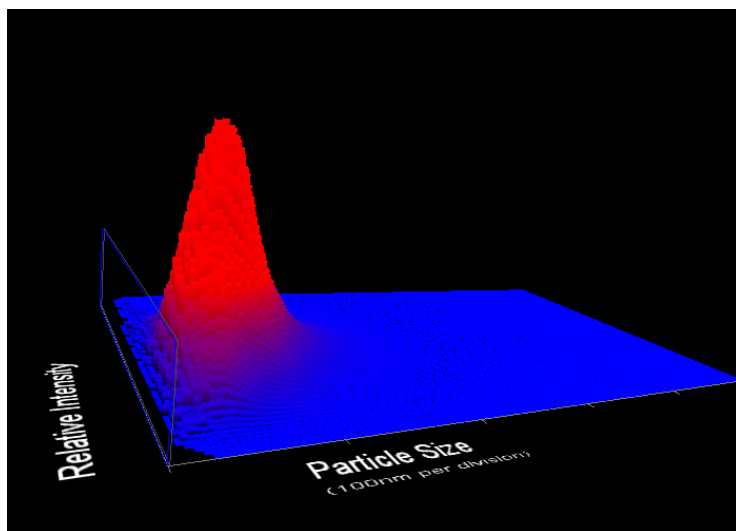

Particle Size / Relative Intensity 3D plot

Operator:  
 Sample:  
 Video File: syrup.avi analysis no: 002  
 Date/Time of Report: 18/10/2012 11:34:39  
 Dispersant/Diluent:  
 Concentration:  
 Pre-treatment:  
 Remarks:

RESULTS:  
 Size Distribution: Mean: 54 nm, Mode: 45 nm, SD: 23 nm  
 Cumulative Data (nm): D10: 27, D50: 50, D90: 84, D70: 63  
 User Lines: 1 nm, 0 nm  
 Total Concentration: 108.03 particles / frame, 21.44E8 particles / ml  
 Selected Concentration: 0.00 particles / frame, 0.00E8 particles / ml  
 Fitted Curve : Mean: 0 nm, SD: 0  
 Completed Tracks: 3188  
 Drift Velocity: 4772 nm/s

ANALYSIS SETTINGS:  
 Frames Processed: 1516 of 1516  
 Frames per Second: 25.27  
 Calibration: 158 nm/pixel  
 Blur: Auto  
 Detection Threshold: 10 Multi  
 Min Track Length: Auto  
 Min Expected Size: Auto  
 Temperature: 25.70 °C  
 Viscosity: 0.87 cP
