# Supplementary material for: Evaluation of biomass-derived stabilising agents for colloidal silver nanoparticles via nanoparticle tracking analysis (NTA)
Source: Royal Society of Chemistry journal article supplement (doi:10.1039/c3ra40368h), 2013-01-01
Supplement: c3ra40368h_4.pdf [file c3ra40368h_4.pdf]

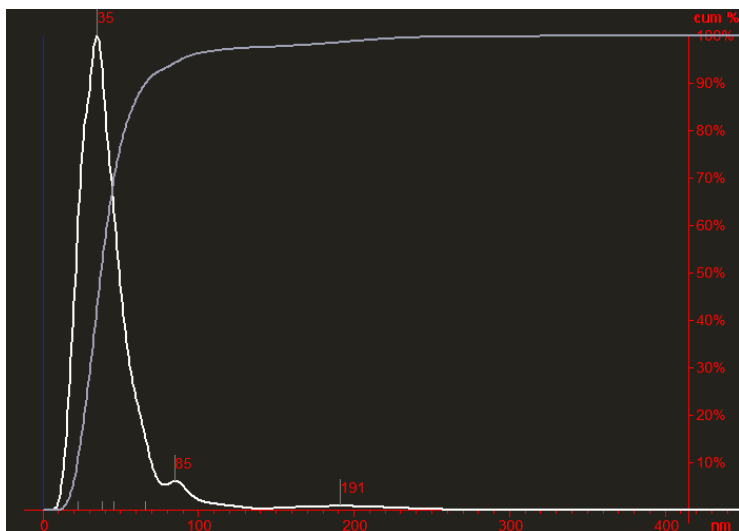

Particle Size / Concentration

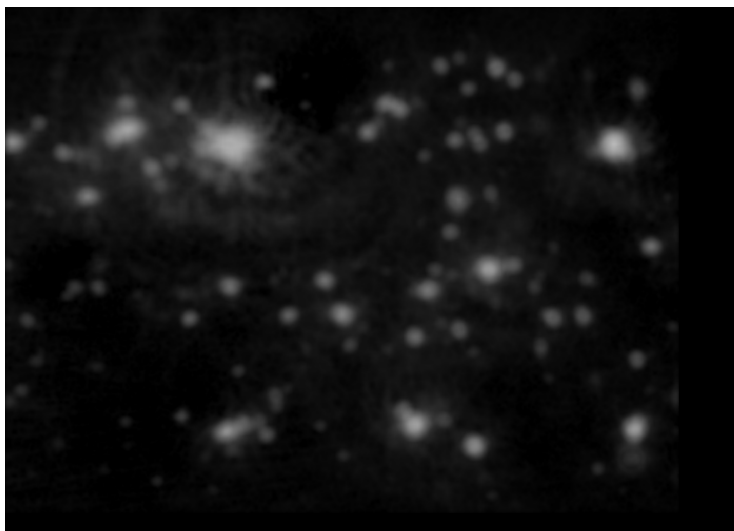

Sample Video Frame

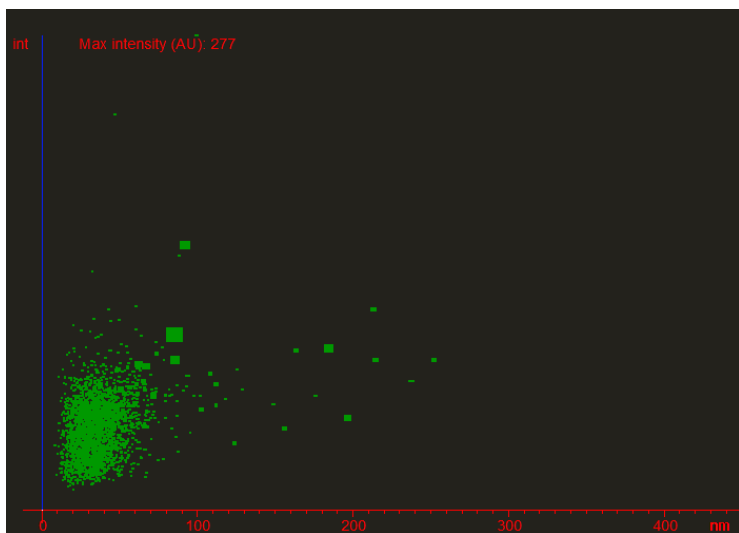

Particle Size / Relative Intensity

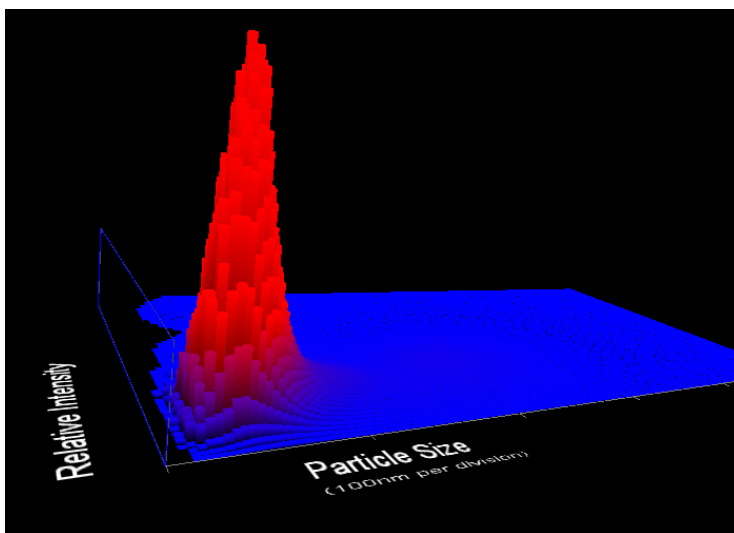

Particle Size / Relative Intensity 3D plot

Operator:  
Sample:  
Video File: alginic.avi analysis no: 002  
Date/Time of Report: 18/10/2012 11:23:43  
Dispersant/Diluent:  
Concentration:  
Pre-treatment:  
Remarks:

**RESULTS:**  
Size Distribution: Mean: 45 nm, Mode: 35 nm, SD: 30 nm  
Cumulative Data (nm): D10: 23, D50: 38, D90: 66, D70: 46  
User Lines: 0 nm, 0 nm  
Total Concentration: 52.50 particles / frame, 9.51E8 particles / ml  
Selected Concentration: 0.00 particles / frame, 0.00E8 particles / ml  
Fitted Curve : Mean: 0 nm, SD: 0  
Completed Tracks: 2463  
Drift Velocity: 719 nm/s

**ANALYSIS SETTINGS:**  
Frames Processed: 1530 of 1530  
Frames per Second: 25.51  
Calibration: 158 nm/pixel  
Blur: Auto  
Detection Threshold: 10 Multi  
Min Track Length: Auto  
Min Expected Size: Auto  
Temperature: 25.10 °C  
Viscosity: 0.89 cP
