# Supplementary material for: Evaluation of biomass-derived stabilising agents for colloidal silver nanoparticles via nanoparticle tracking analysis (NTA)
Source: Royal Society of Chemistry journal article supplement (doi:10.1039/c3ra40368h), 2013-01-01
Supplement: c3ra40368h_7.pdf [file c3ra40368h_7.pdf]

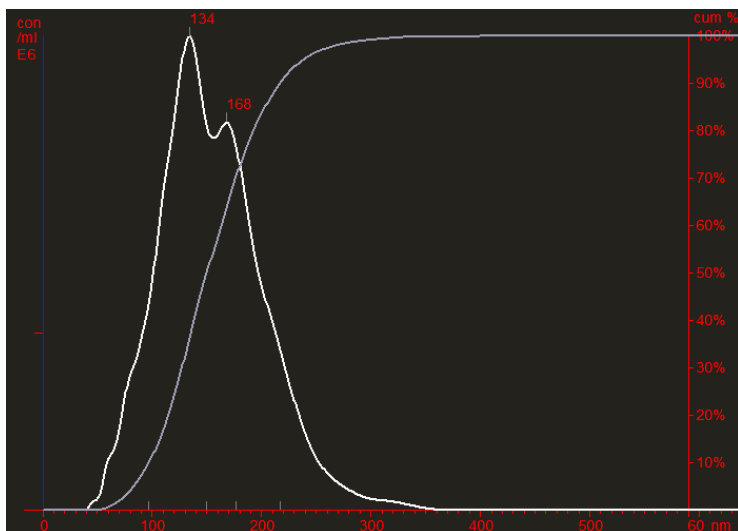

Particle Size / Concentration

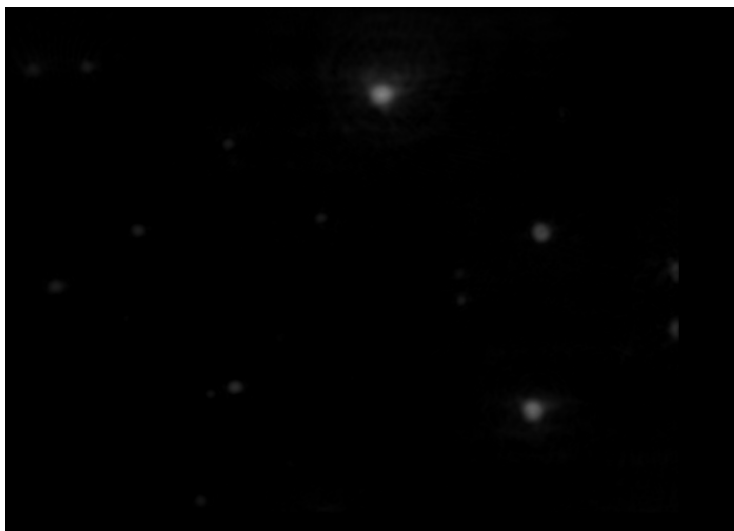

Sample Video Frame

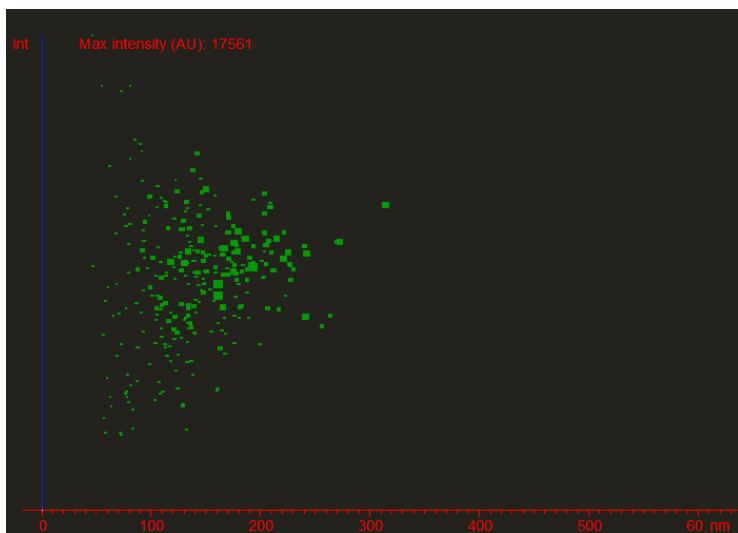

Particle Size / Relative Intensity

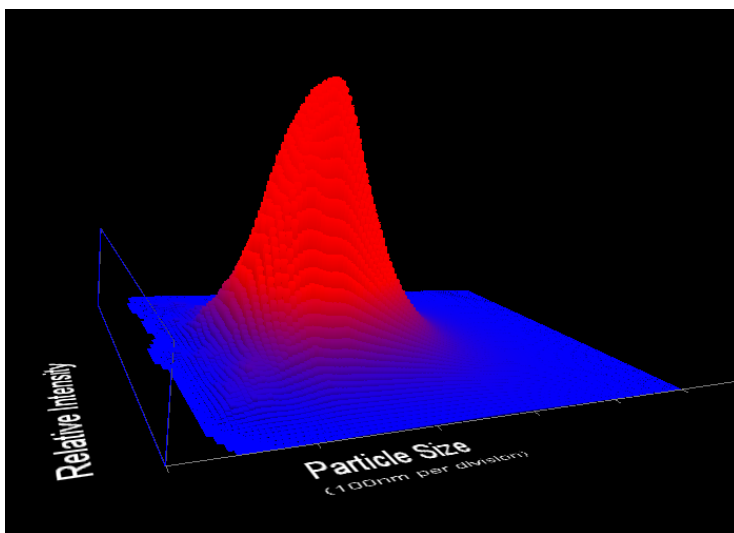

Particle Size / Relative Intensity 3D plot

Operator:  
 Sample:  
 Video File: Ag.avi analysis no: 002  
 Date/Time of Report: 18/10/2012 10:51:58  
 Dispersant/Diluent:  
 Concentration:  
 Pre-treatment:  
 Remarks:

**RESULTS:**  
 Size Distribution: Mean: 155 nm, Mode: 134 nm, SD: 46 nm  
 Cumulative Data (nm): D10: 97, D50: 150, D90: 217, D70: 177  
 User Lines: 0 nm, 0 nm  
 Total Concentration: 17.51 particles / frame, 2.85E8 particles / ml  
 Selected Concentration: 0.00 particles / frame, 0.00E8 particles / ml  
 Fitted Curve : Mean: 0 nm, SD: 0  
 Completed Tracks: 290  
 Drift Velocity: 2670 nm/s

**ANALYSIS SETTINGS:**  
 Frames Processed: 1528 of 1528  
 Frames per Second: 25.48  
 Calibration: 158 nm/pixel  
 Blur: Auto  
 Detection Threshold: 10 Multi  
 Min Track Length: Auto  
 Min Expected Size: Auto  
 Temperature: 25.10 °C  
 Viscosity: 0.89 cP
